# Supplementary material
Source: PubMed Central journal article supplement (PMC3811871)
Supplement: MCB.01387-12_zmb999100121so1.pdf [file MCB.01387-12_zmb999100121so1.pdf]

## Supplemental Figures

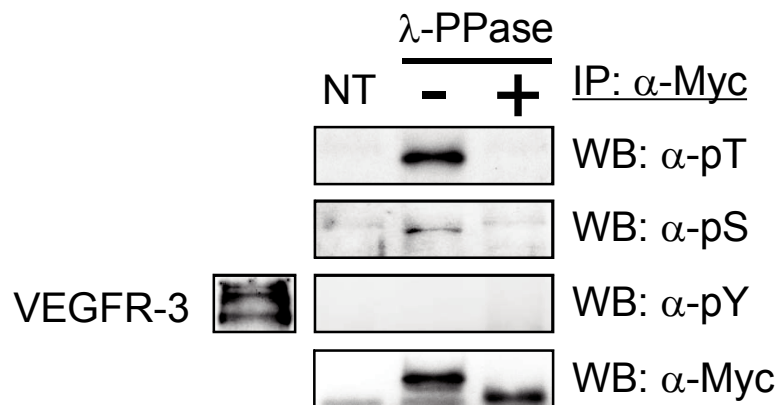

Supplemental Figure S1. **FOXC2 is phosphorylated on both serine and threonine but not on tyrosine residues.** Adenovirus-expressed Myc-FOXC2 was immunoprecipitated from HepG2 cells with anti-Myc antibody (IP:  $\alpha$ -Myc) and treated (+) or not (-) with lambda protein phosphatase ( $\lambda$ -PPase) while the protein was still bound to the immunoaffinity beads. The immunoprecipitates were analyzed by Western blotting (WB) with anti-phosphothreonine ( $\alpha$ -pT), anti-phosphoserine ( $\alpha$ -pS), anti-phosphotyrosine ( $\alpha$ -pY) and anti-Myc antibodies. Immunoprecipitate from non-transduced (NT) cells was used as a negative control. Tyrosine-phosphorylated vascular endothelial growth factor receptor 3 (VEGFR-3) was used as a positive control in the  $\alpha$ -pY immunoblot. Disappearance of bands corresponding to the phosphatase-treated protein is diagnostic of phosphorylation and confirms the antibody specificity. Higher intensity of the  $\alpha$ -pT band compared to that of the  $\alpha$ -pS band is not due to predominant threonine phosphorylation, but rather to the higher quality of the  $\alpha$ -pT antibody. The nonspecific band seen in the  $\alpha$ -pS blot corresponds to the heavy chain of the  $\alpha$ -Myc antibody used in immunoprecipitation.

**A**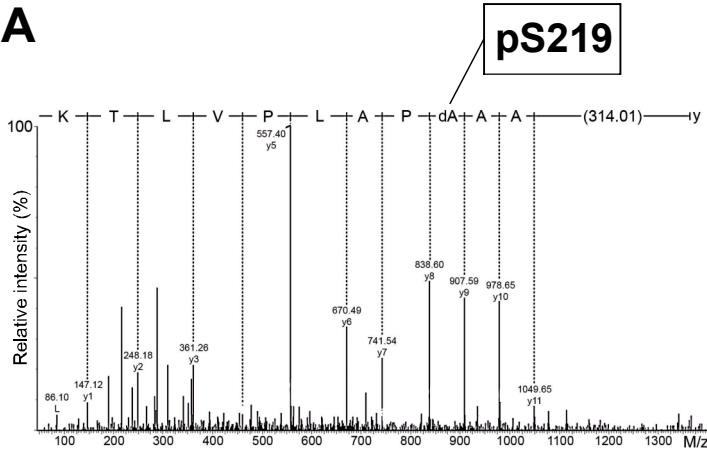**B**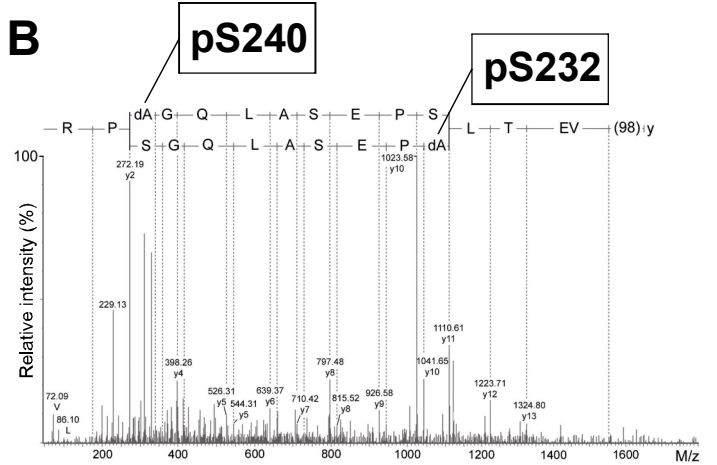**C**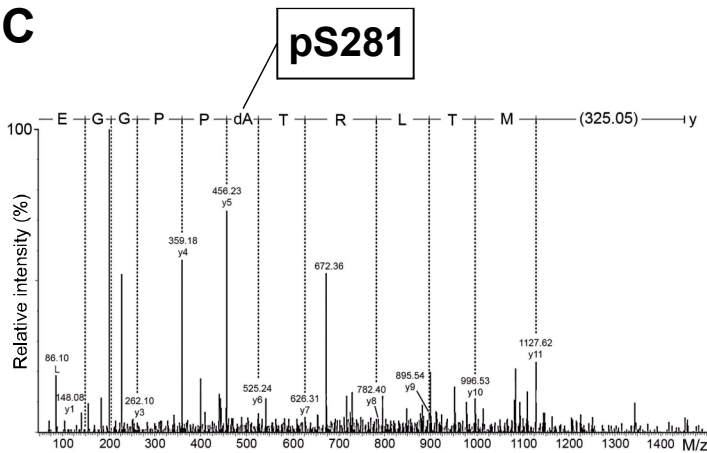**D**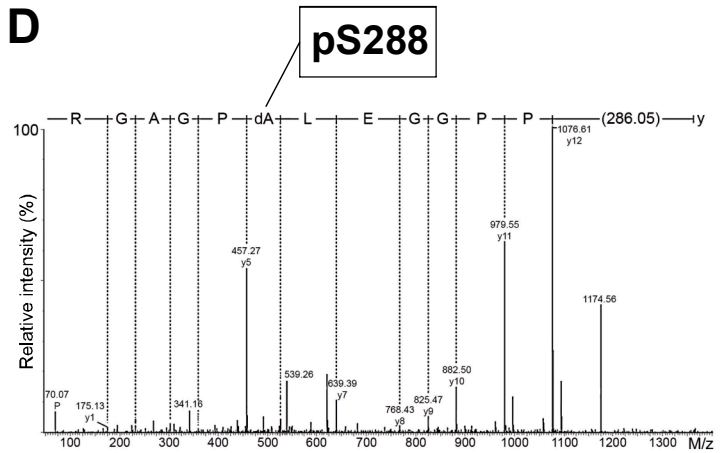**E**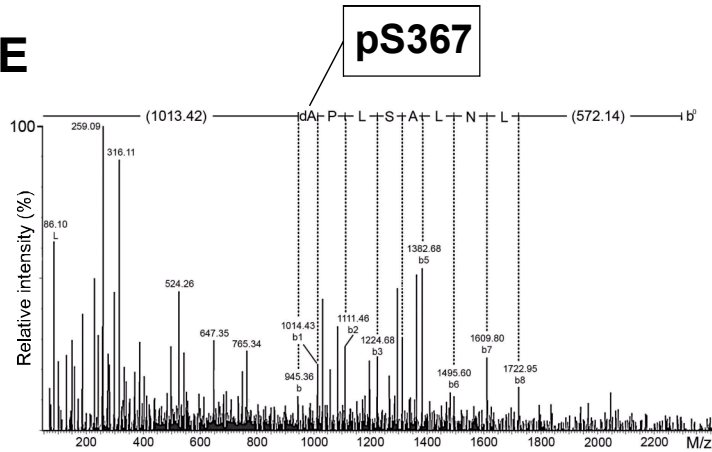

Supplemental Figure S2. **Identification of six proline-directed serine phosphorylation sites in Myc-FOXC2 by LC-MS/MS analysis.** MS/MS fragmentation spectra of phosphorylated tryptic (A,B,C,D) or GluC (E) peptides derived from Myc-FOXC2. Callouts indicate phosphorylated serine residues and their positions in the untagged protein. Dehydroalanine (dA) represents chemical signature left by the neutral loss of phosphoric acid from the phosphorylated serine residues.

**A**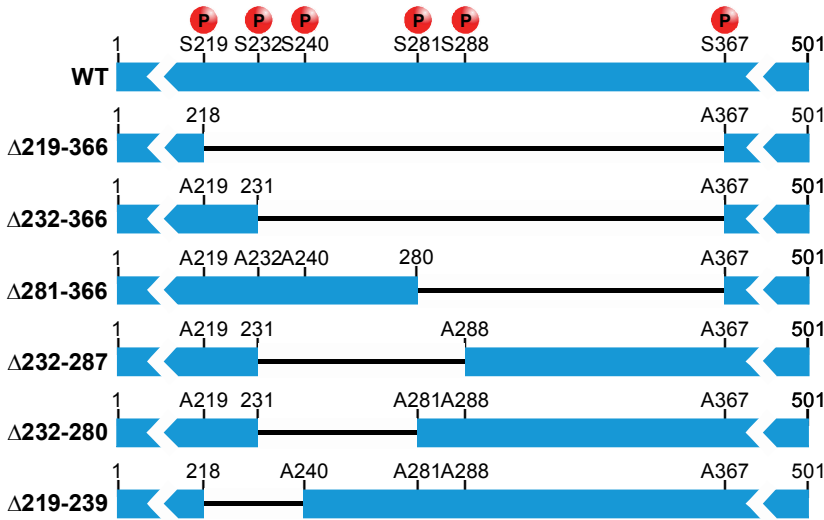

| Construct | λ-PPase |   | Mobility shift |
|-----------|---------|---|----------------|
|           | -       | + |                |
| WT        |         |   | +              |
| Δ219-366  |         |   | -              |
| Δ232-366  |         |   | -              |
| Δ281-366  |         |   | +              |
| Δ232-287  |         |   | -              |
| Δ232-280  |         |   | -              |
| Δ219-239  |         |   | +              |

**B**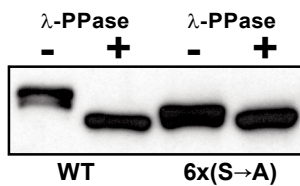**C**

| Construct           | λ-PPase |   | Mobility shift |
|---------------------|---------|---|----------------|
|                     | -       | + |                |
| 6x(S→A)             |         |   | +              |
| 6x(S→A)+T247A       |         |   | +              |
| 6x(S→A)+S251A       |         |   | +              |
| 6x(S→A)+T247A+S251A |         |   | -              |

6x(S→A) = S219A+S232A+S240A+S281A+S288A+S367A

Supplemental Figure S3. **Identification of T247 and S251 phosphorylation sites in FOXC2 by deletion and site-directed mutagenesis.** (A) Systematic deletion mutagenesis of the phosphorylated domain in Myc-FOXC2. Positions of six phosphorylated serine residues identified by LC-MS/MS are shown as red spheres above the wild type (WT) protein sequence. These residues have been replaced by alanines (A219, A232, A240, A281, A288 and A367) in six deletion mutants shown below. The effects of λ-PPase treatment on the electrophoretic mobility of wild type Myc-FOXC2 and each deletion mutant are summarized in the table on the right. Two out of six deletion mutants exhibited electrophoretic mobility shifts upon enzymatic dephosphorylation, narrowing the phosphorylation site search to a stretch of amino acids from aa241 to 280. (B) Side-by-side comparison of phosphatase-induced changes in electrophoretic mobility of wild type Myc-FOXC2 and its mutant 6x(S→A), in which S219, S232, S240, S281, S288 and S367 were replaced by alanines. (C) Site-directed mutagenesis of two potential proline-directed phosphorylation sites (T247 and S251) between aa241 and 280. Simultaneous but not successive replacement of T247 and S251 with alanine, bringing the total number of alanine substitutions to eight, abolished the phosphorylation-dependent electrophoretic mobility shift of Myc-FOXC2. Shown are Western blots probed with anti-Myc antibody.

**A**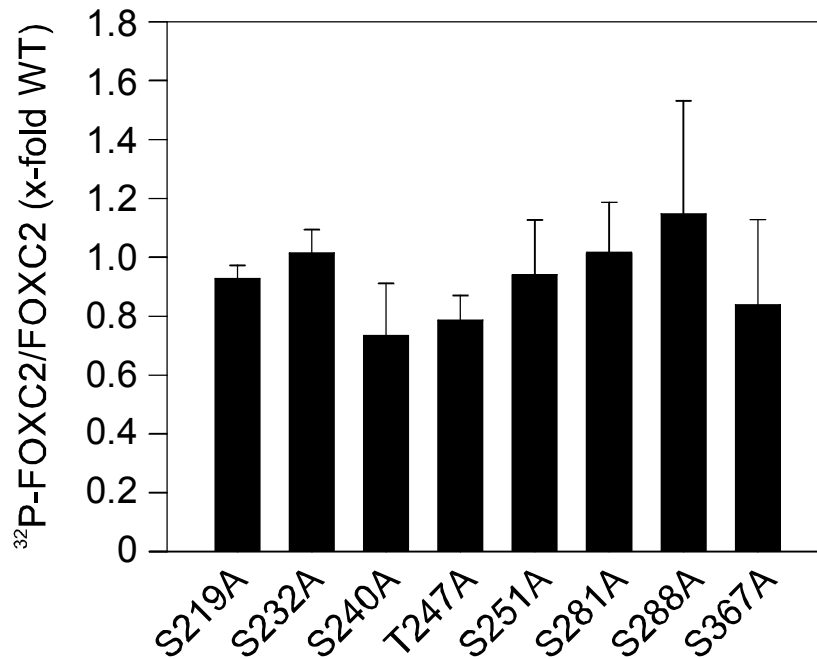**B**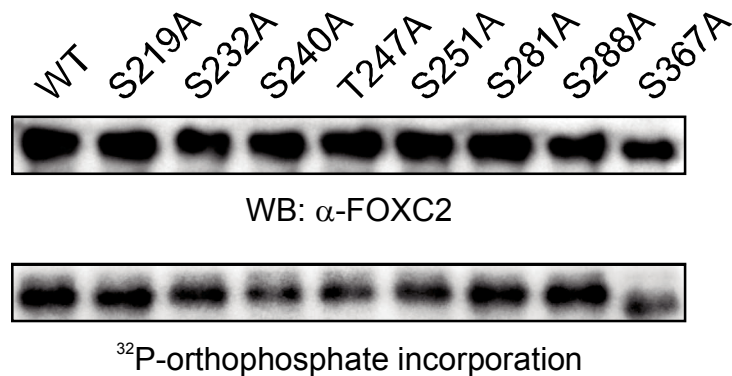

Supplemental Figure S4. **FOXC2 does not contain distinct primary and secondary phosphorylation sites.** (A) Eight individual phosphorylation site mutants of Myc-FOXC2, each having only one phosphorylated residue mutated to alanine, were assayed for metabolic incorporation of radioactive orthophosphate. The radiolabeled proteins were immunoprecipitated from cell lysates with anti-Myc antibody and analyzed by immunoblotting and autoradiography. The intensity of each radioactive band was quantitated by densitometry and normalized to the amount of immunoprecipitated protein. The data are presented as fold change relative to the level of radioactive orthophosphate incorporated into wild type (WT) Myc-FOXC2. Bars correspond to the mean of two independent experiments  $\pm$  standard deviation. Note that none of the individual mutations alone caused a strong decrease in radioactive phosphate incorporation into FOXC2. (B) Representative immunoblot and autoradiogram.

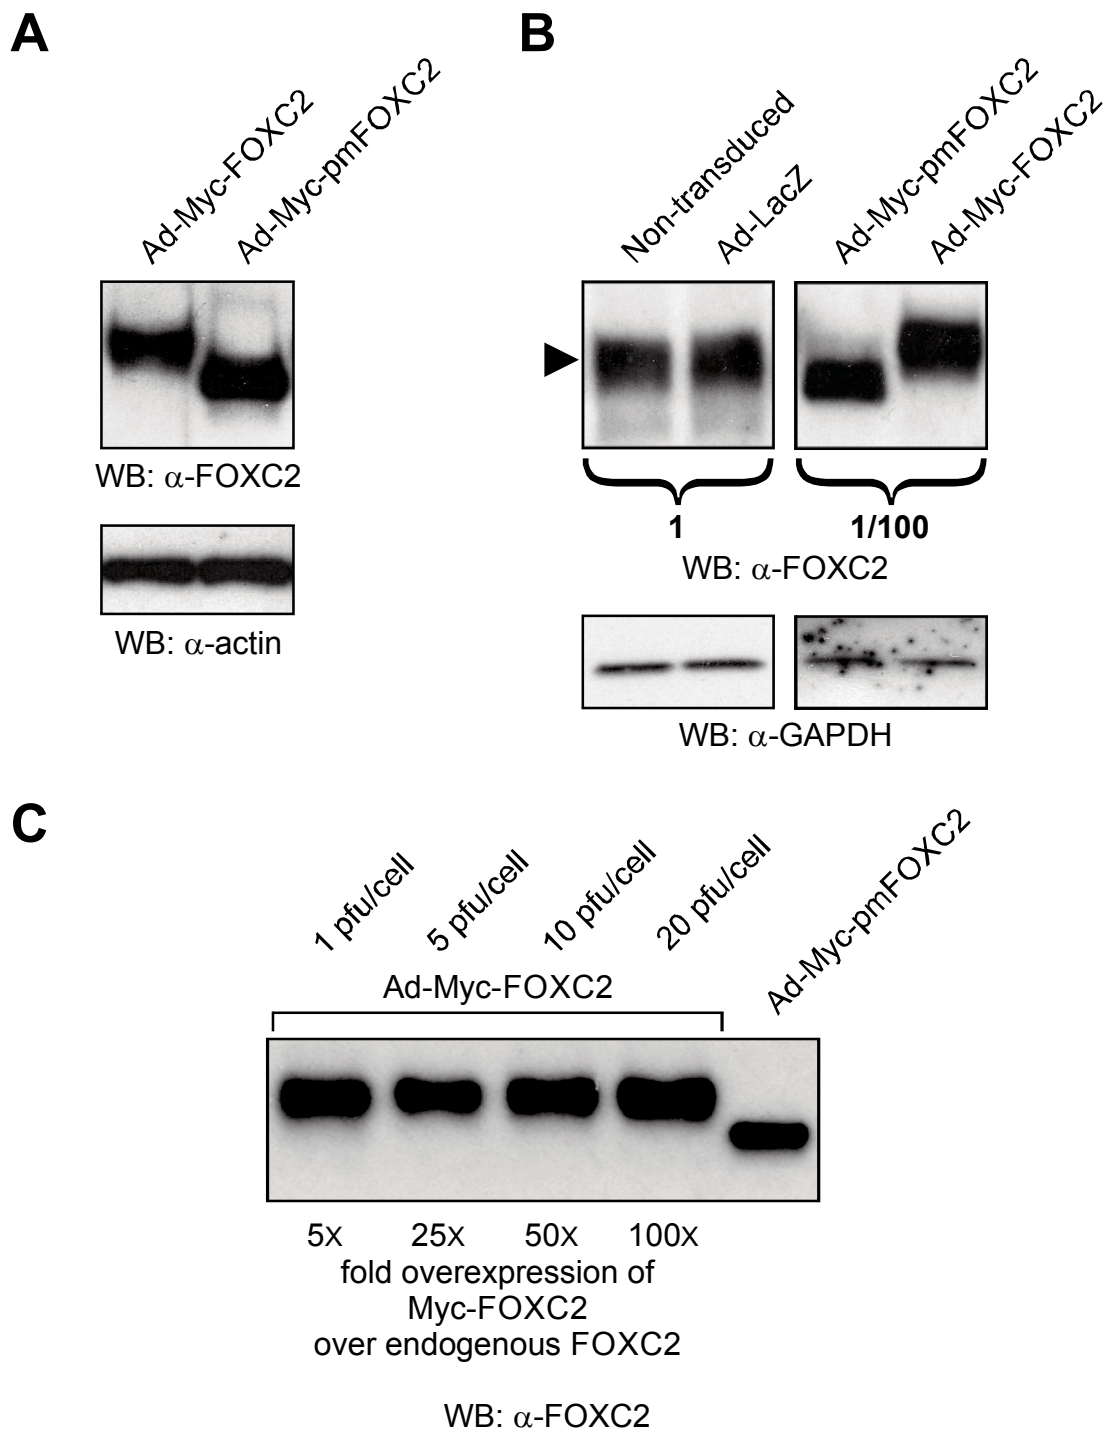

Supplemental Figure S5. **Immunoblot analysis of Myc-FOXC2 and Myc-pmFOXC2 expression in LECs.** (A) Myc-FOXC2 and Myc-pmFOXC2 are expressed at similar levels in LECs transduced with 20 plaque-forming units per cell (pfu/cell) of the corresponding recombinant adenoviruses. (B) Comparison of endogenous and exogenous FOXC2 expression levels in LECs. Lysates of LECs transduced with 20 pfu/cell of Ad-Myc-FOXC2 were diluted 100-fold to achieve band intensity similar to that of endogenous FOXC2. The position of endogenous FOXC2 is marked by an arrowhead. Note that Myc-FOXC2 has lower electrophoretic mobility than endogenous FOXC2 due to the extra 1.5 kDa coming from the Myc-tag. (C) Rising levels of FOXC2 expression in LECs have no impact on its electrophoretic mobility, suggesting that the phosphorylation status of FOXC2 is not significantly affected by its overexpression. Note the absence of FOXC2 mobility shift in cells transduced with increasing quantities of Ad-Myc-FOXC2. The amounts of cell lysates loaded on the gel were adjusted to produce FOXC2 bands of approximately equal intensity. Myc-pmFOXC2 was run in parallel as a control for mobility shift. Shown are Western blots of LEC lysates probed with anti-FOXC2, anti-actin or anti-GAPDH antibodies. In lane Ad-LacZ, LECs were transduced with recombinant adenovirus expressing an irrelevant gene, bacterial  $\beta$ -galactosidase.

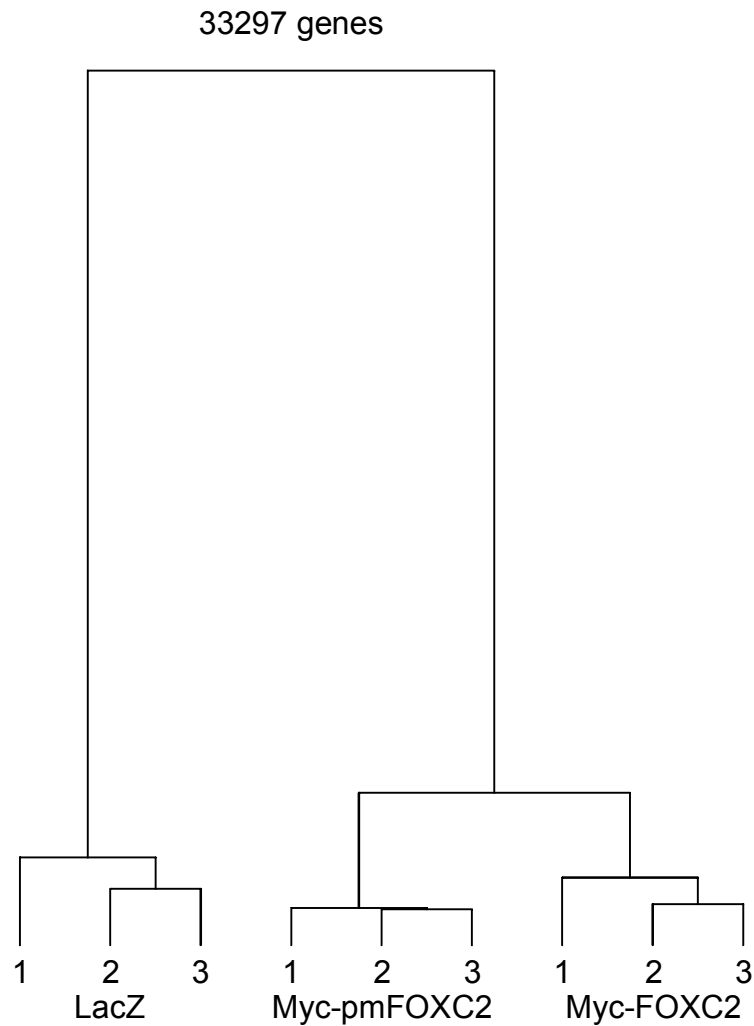

Supplemental Figure S6. **Dendrogram illustrating the hierarchical cluster analysis of microarray gene expression data.** The data were obtained from LECs overexpressing Myc-FOXC2, Myc-pmFOXC2 or a control protein, bacterial  $\beta$ -galactosidase (LacZ). Three biological replicates were performed for each experiment. Note that Myc-FOXC2 and Myc-pmFOXC2 form separate clusters.

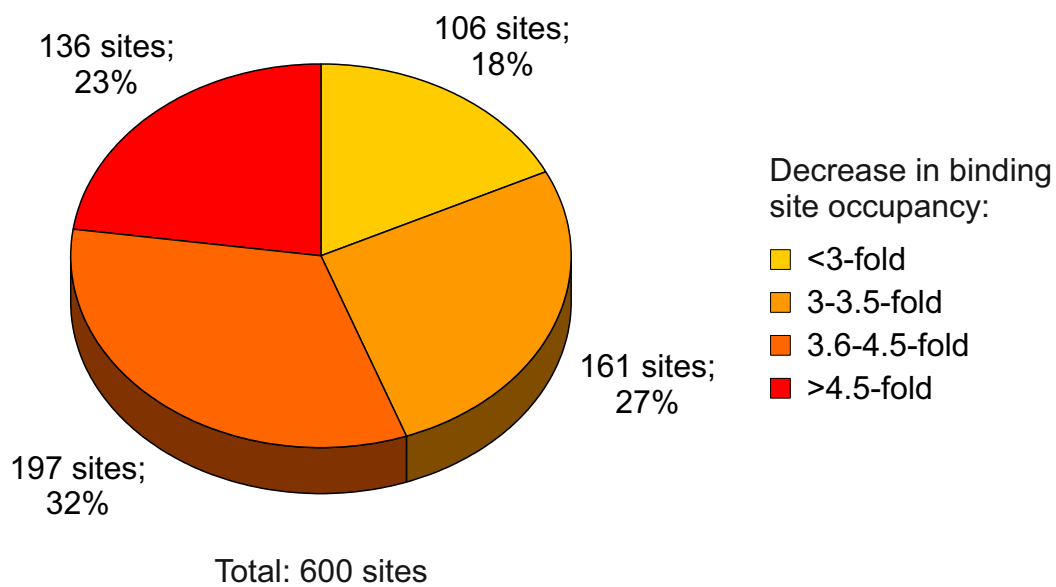

Supplemental Figure S7. **Loss of phosphorylation exerts variable inhibitory effects on FOXC2 recruitment to physiological binding sites in LECs.** The chart shows proportional distribution of the inhibitory effects across 600 phosphorylation-regulated binding sites enriched in Myc-FOXC2 over Myc-pmFOXC2 ( $p\text{-value} < 10^{-5}$ ) and overlapping with endogenous FOXC2 binding sites from Normén et al., 2009.

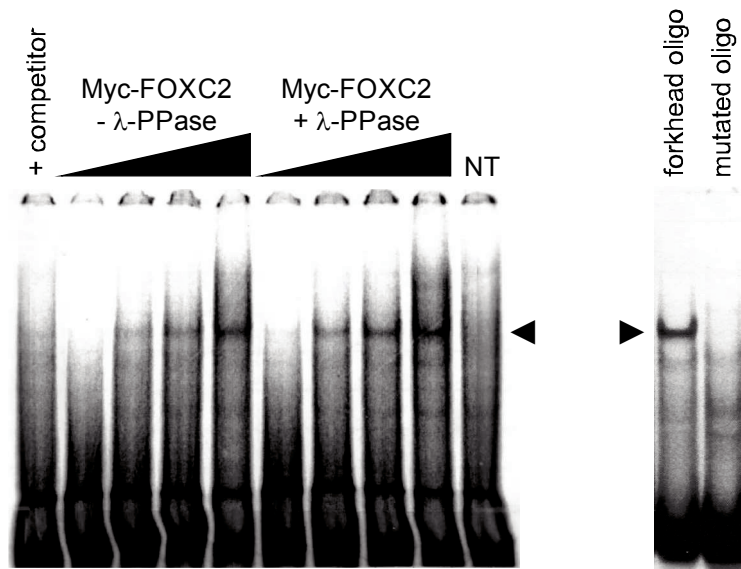

Supplemental Figure S8. **Dephosphorylation with  $\lambda$ -PPase does not affect the *in vitro* binding of Myc-FOXC2 to double stranded oligonucleotide bearing two forkhead consensus motifs.** We used electrophoretic mobility shift assay (EMSA) to determine whether the DNA binding activity of Myc-FOXC2 is reduced following treatment with  $\lambda$ -PPase. Increasing amounts of Ad-Myc-FOXC2-transduced cell lysates were treated (+) or not (-) with  $\lambda$ -PPase and incubated with radiolabeled dsDNA oligonucleotide 5'-GATCCTTAAGTAA-**GTAACAAACA**AAGATCCTTAAGTAA**GTAACAAACA**AAGATC-3' (only one strand is shown, forkhead consensus sequences are in bold and underlined). The resulting protein-DNA complexes were resolved by gel electrophoresis and visualized by phosphorimager analysis. Arrowhead indicates the position of specific Myc-FOXC2-DNA complexes. The binding specificity was confirmed by (a) competition EMSA using unlabeled dsDNA of the same sequence (left lane), (b) incubation of radiolabeled dsDNA with nontransduced cell lysate (lane NT), and (c) incubation of Ad-Myc-FOXC2-transduced cell lysates with radiolabeled oligonucleotide mutated in the consensus forkhead binding site (**TGGAACAATA**, mutated nucleotides are highlighted in grey, right panel).



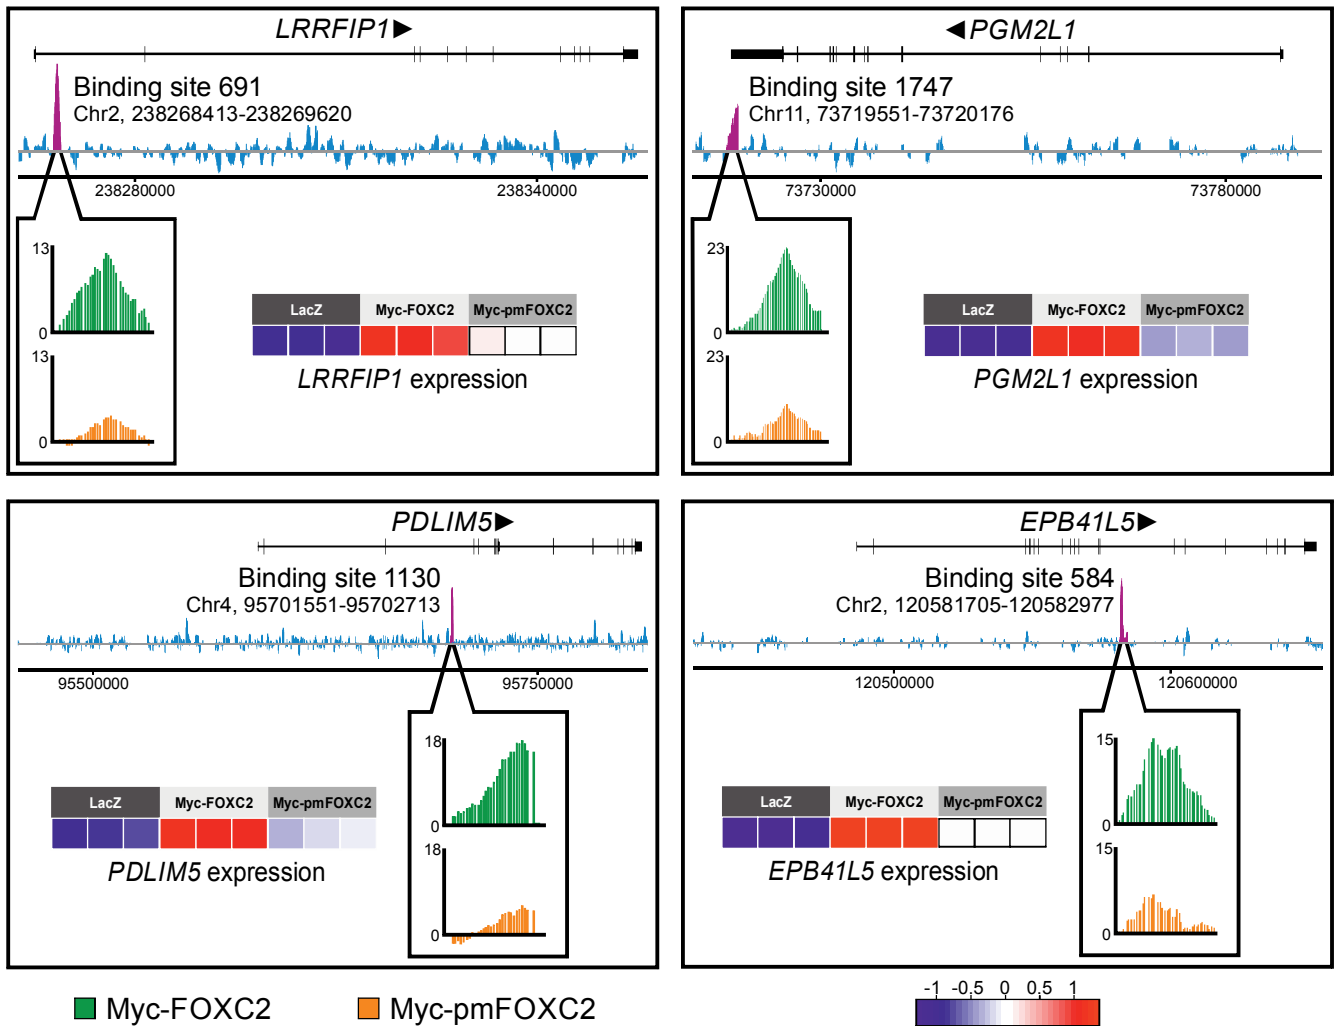

Supplemental Figure S9. **Loss of FOXC2 phosphorylation downregulates expression of putative direct FOXC2 target genes.** Shown is the correlation between the decreased FOXC2 recruitment to genomic binding sites in response to the loss of phosphorylation and the decreased transcriptional activation of the neighboring putative direct FOXC2 target genes. The positions of the genes are indicated at the top of each panel. Vertical lines, exons; horizontal lines, introns. For each gene, only one splice variant is shown. Arrowheads indicate the direction of transcription. Below are enrichment profiles of endogenous FOXC2. Purple peaks indicate FOXC2-enriched regions; their relative occupancies by Myc-FOXC2 and Myc-pmFOXC2 are shown in callout boxes in green and orange, respectively. Vertical axes represent MAT score. Endogenous FOXC2 binding sites are numbered as in Normén et al. (2009); genomic coordinates refer to the hg18 human genome assembly. Heat maps show the expression levels of putative direct FOXC2 target genes in iLECs transduced with Ad-LacZ, Ad-Myc-FOXC2 and Ad-Myc-pmFOXC2. Three biological replicates are shown for each experiment. Color key at the lower left corresponds to the arctan-transformed log<sub>2</sub>-fold change in gene expression. Blue denotes genes with relative decreased expression, red denotes genes with relative increased expression.

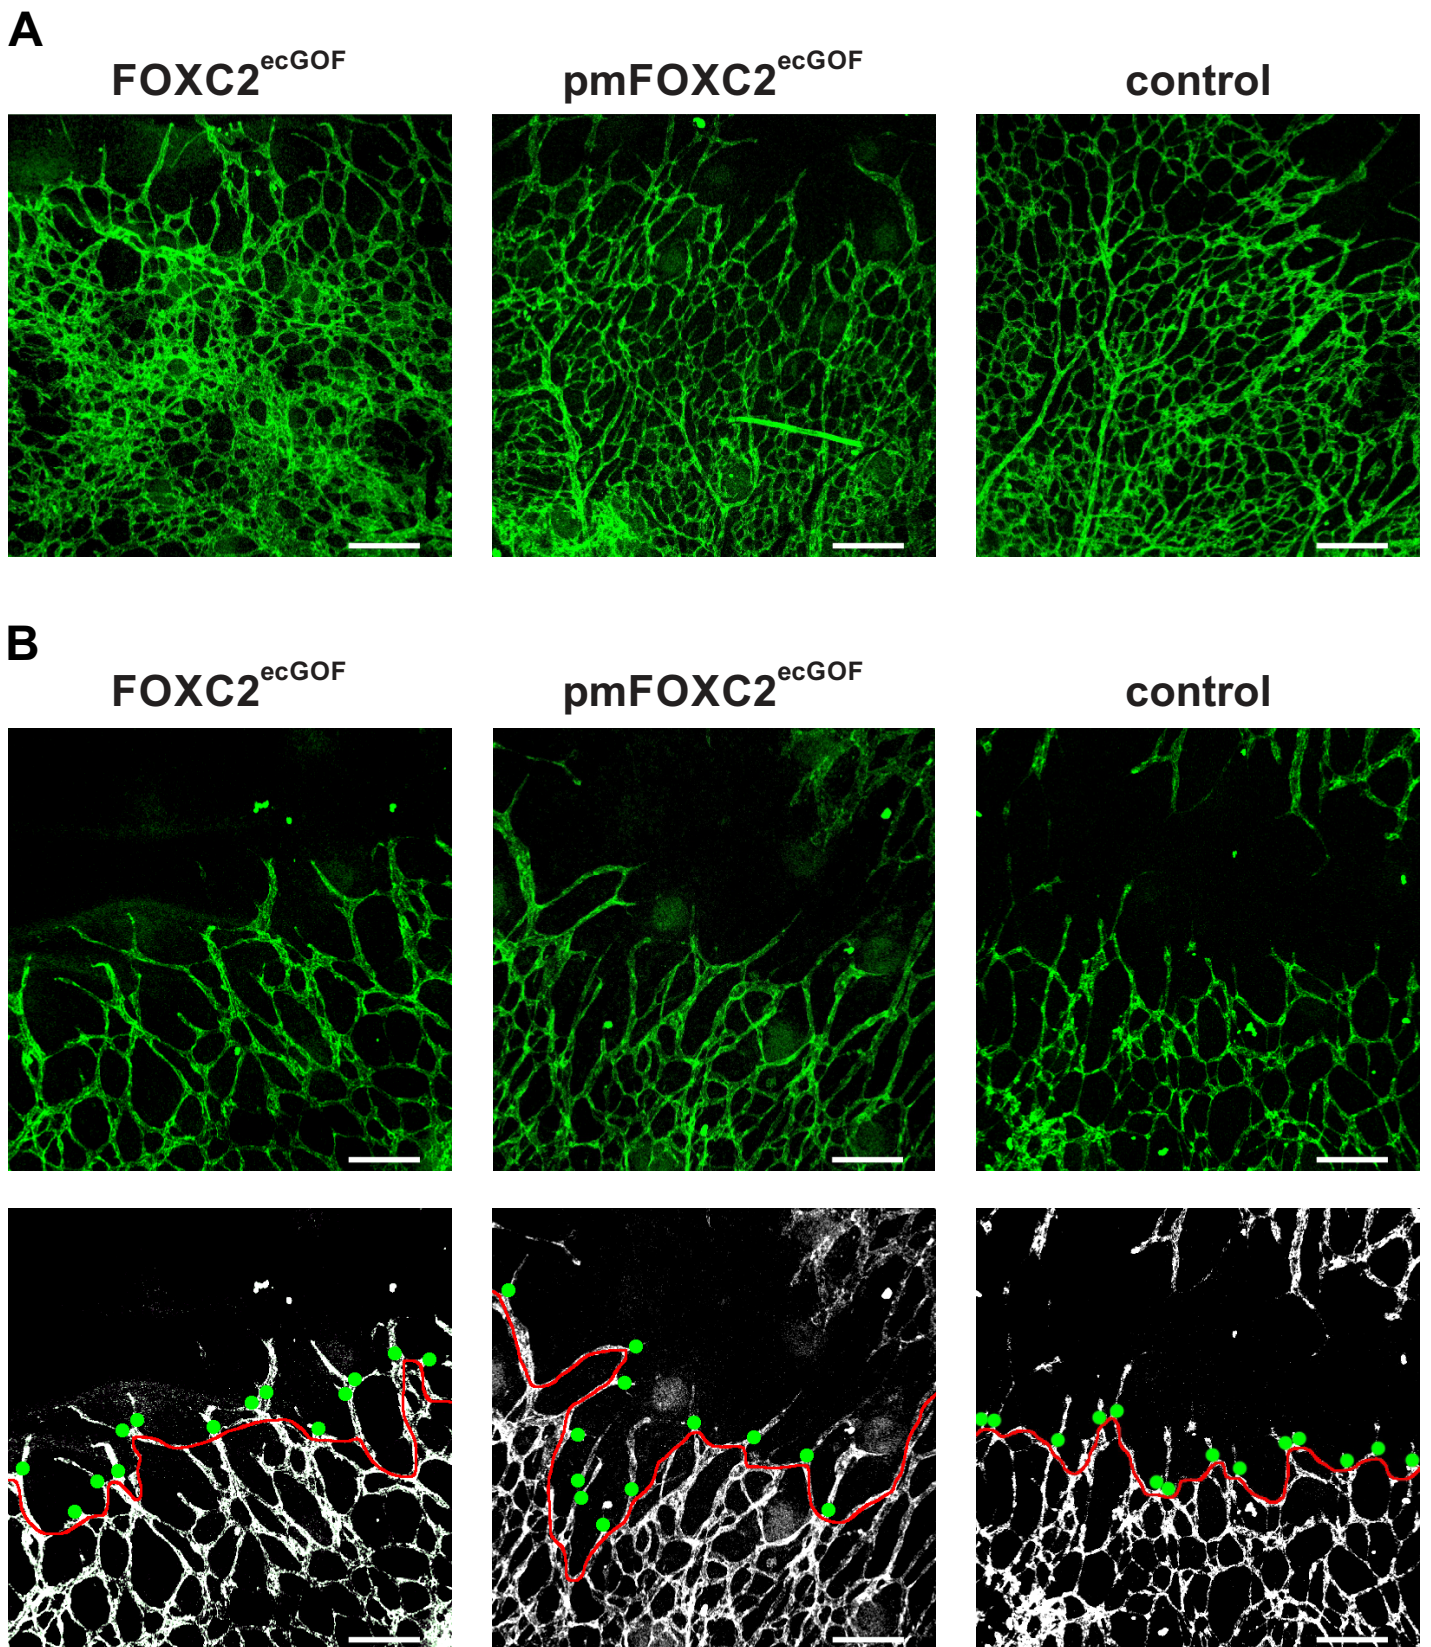

Supplemental Figure S10. **Overexpression of FOXC2, but not pmFOXC2, promotes vascular remodeling in maturing capillaries.** (A) Lower magnification view of capillary plexus in the head skin of E15.5 embryos. Whole-mount staining for pan-endothelial marker CD31. Bar, 200  $\mu\text{m}$ . (B) Example of images used for quantification of sprouting at the vascular front in FOXC2<sup>ecGOF</sup>, pmFOXC2<sup>ecGOF</sup> and control embryos. Green dots indicate sprouting endothelial cells, and red line outlines the angiogenic front as described in Pitulescu et al., 2010. Bar, 145  $\mu\text{m}$ .



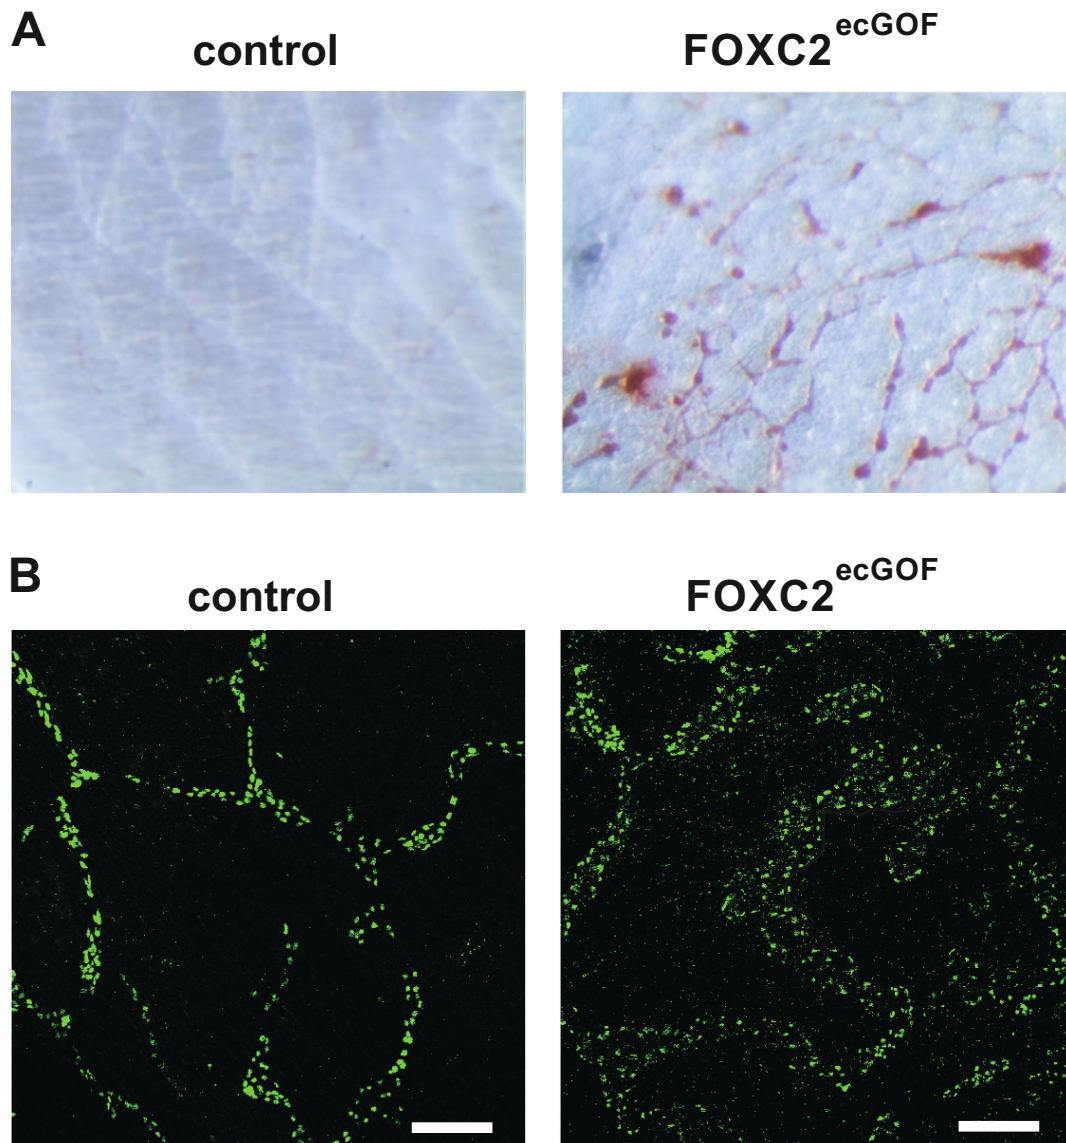

Supplemental Figure S11. **Example of blood-filled lymphatic vessels in FOXC2<sup>ecGOF</sup> embryos.** (A) Dorsal skin of E16.5 control and FOXC2<sup>ecGOF</sup> embryo. (B) Whole mount staining of control or blood-filled dermal lymphatic vessels in FOXC2<sup>ecGOF</sup> mice. Immunofluorescent staining for PROX1 (green) at E16.5. Bar, 150  $\mu$ m.

## Supplemental Tables

Supplemental Table S1. **Masses, relative intensities and positions of tryptic peptides derived from Myc-FOXC2 treated (+) or not (-) with lambda protein phosphatase ( $\lambda$ -PPase).** Phosphopeptides are marked in red. Peptide masses are given in daltons (Da); amino acid numbering is the same as in the untagged protein.

| Myc-FOXC2<br>- $\lambda$ -PPase |                       | Myc-FOXC2<br>+ $\lambda$ -PPase |                       | Theoretical<br>m (Da) | Position<br>(amino acids) |
|---------------------------------|-----------------------|---------------------------------|-----------------------|-----------------------|---------------------------|
| Observed<br>m (Da)              | Relative<br>intensity | Observed<br>m (Da)              | Relative<br>intensity |                       |                           |
| 1505,707                        | 4654                  | 1505,687                        | 1690                  | 1505,736              | -8-4                      |
| 2533,203                        | 1647                  | 2533,180                        | 949                   | 2533,211              | 5-26                      |
| 2775,128                        | 2785                  | 2775,112                        | 1433                  | 2775,183              | 27-54                     |
| 1602,736                        | 96                    | 1602,720                        | 45                    | 1602,768              | 55-68                     |
| 2247,006                        | 62                    | 2246,990                        | 27                    | 2247,196              | 73-92                     |
| 3353,744                        | 179                   | 3353,686                        | 143                   | 3353,667              | 111-138                   |
| 987,474                         | 61                    | 987,465                         | 30                    | 987,488               | 114-121                   |
| 2141,174                        | 51                    | 2141,140                        | 20                    | 2141,104              | 122-139                   |
| 2498,055                        | 160                   | 2498,025                        | 93                    | 2498,085              | 143-163                   |
| 1649,747                        | 550                   | 1649,722                        | 276                   | 1649,909              | 168-180                   |
| 1567,733                        | 115                   | 1567,721                        | 62                    | 1567,831              | 172-184                   |
| 1244,672                        | 591                   | 1244,649                        | 262                   | 1244,687              | 181-192 <sup>a</sup>      |
| 1244,632                        | 553                   | 1244,629                        | 238                   | 1244,651              | 193-205 <sup>a</sup>      |
| 1701,846                        | 71                    | 1701,829                        | 35                    | 1701,868              | 193-209                   |
| 3401,827                        | 102                   | 3401,768                        | 204                   | 3401,912              | 210-242                   |
| 3481,795                        | 88                    | 3481,777                        | 58                    | 3481,878              | P + 210-242               |
| 1282,705                        | 806                   | 1282,679                        | 403                   | 1282,713              | 215-227                   |
| 1362,655                        | 237                   | 1362,643                        | 65                    | 1362,679              | P + 215-227               |
| 1569,773                        | 933                   | 1569,750                        | 789                   | 1569,799              | 228-242                   |
| 1649,747                        | 550                   | 1649,722                        | 276                   | 1649,766              | P + 228-242               |
| 1729,712                        | 71                    | 1729,689                        | 13                    | 1729,732              | 2P + 228-242              |
| 3655,683                        | 1373                  | 3655,606                        | 1907                  | 3655,769              | 243-279                   |
| 1281,611                        | 474                   | 1281,609                        | 1816                  | 1281,631              | 280-293                   |
| 1361,584                        | 596                   | 1361,570                        | 67                    | 1361,597              | P + 280-293               |
| 1441,548                        | 68                    |                                 |                       | 1441,563              | 2P + 280-293              |
| 3954.878 <sup>b</sup>           | 1078                  | 3954.831 <sup>b</sup>           | 975                   | 3956,937              | 294-334                   |
| 919,388                         | 48                    | 919,369                         | 16                    | 919,397               | 452-458                   |
| 2522,170                        | 60                    | 2522,133                        | 9                     | 2522,206              | 459-482                   |
| 832,435                         | 109                   | 832,407                         | 109                   | 832,444               | 483-489                   |
| 1417,579                        | 84                    |                                 |                       | 1417,597              | 490-501                   |

<sup>a</sup> peptides identified based on retention times

<sup>b</sup> reduced peptide mass likely due to internal disulfide bond

Supplemental Table S2. **Masses, relative intensities and positions of Glu-C peptides derived from Myc-FOXC2 treated (+) or not (-) with lambda protein phosphatase ( $\lambda$ -PPase).** Phosphopeptides are marked in red. Peptide masses are given in daltons (Da); amino acid numbering is the same as in the untagged protein.

| Myc-FOXC2<br>- $\lambda$ -PPase |                       | Myc-FOXC2<br>+ $\lambda$ -PPase |                       | Theoretical<br>m (Da) | Position<br>(amino acids) |
|---------------------------------|-----------------------|---------------------------------|-----------------------|-----------------------|---------------------------|
| Observed<br>m (Da)              | Relative<br>intensity | Observed<br>m (Da)              | Relative<br>intensity |                       |                           |
| 1462,763                        | 237                   | 1462,759                        | 268                   | 1462,685              | -12- (-1)                 |
| 2368,236                        | 776                   |                                 |                       | 2368,170              | 0-21                      |
| 2649,213                        | 1837                  | 2649,203                        | 30                    | 2649,138              | 22-46                     |
| 2331,349                        | 64                    |                                 |                       | 2331,255              | 70-90                     |
| 1013,557                        | 30                    | 1013,546                        | 104                   | 1013,508              | 105-111                   |
| 2037,086                        | 342                   |                                 |                       | 2037,014              | 112-128                   |
| 2792,620                        | 387                   | 2792,633                        | 14                    | 2792,562              | 158-179                   |
| 2956,597                        | 6665                  | 2956,594                        | 5403                  | 2956,551              | 180-208                   |
| 1129,727                        | 56                    | 1129,716                        | 41                    | 1129,670              | 207-216                   |
| 1822,071                        | 629                   | 1822,066                        | 600                   | 1822,008              | 217-234                   |
| 1902,058                        | 2277                  |                                 |                       | 1901,974              | P + 217-234               |
| 1982,006                        | 854                   |                                 |                       | 1981,941              | 2P + 217-234              |
| 2239,132                        | 969                   | 2239,112                        | 6255                  | 2239,071              | 235-258                   |
| 2319,116                        | 1128                  | 2319,081                        | 3499                  | 2319,037              | P + 235-258               |
| 1502,780                        | 4034                  | 1502,771                        | 1146                  | 1502,726              | 259-273                   |
| 1371,719                        | 953                   | 1371,703                        | 2807                  | 1371,682              | 274-286                   |
| 1451,701                        | 911                   |                                 |                       | 1451,648              | P + 274-286               |
| 2232,184                        | 1140                  | 2232,164                        | 445                   | 2232,101              | 357-379                   |
| 2312,120                        | 4496                  |                                 |                       | 2312,067              | P + 357-379               |
| 1202,628                        | 8285                  | 1202,624                        | 6248                  | 1202,586              | 453-462                   |

Supplemental Table S3. **Gene expression signature associated with the loss of FOXC2 phosphorylation in primary LECs.** Shown are 467 genes differentially expressed (>1.5 fold difference, FDR<0.01) between LECs transduced with Ad-Myc-FOXC2 and Ad-Myc-pmFOXC2 (see text for detailed gene selection criteria). Names of genes upregulated or downregulated more than 2-fold are highlighted in orange and purple, respectively. Putative direct FOXC2 target genes regulated by FOXC2 phosphorylation are marked with an asterisk (\*). For these genes, downregulated expression (>1.5 fold change, FDR<0.01) in response to the loss of FOXC2 phosphorylation correlated with the decrease in FOXC2 recruitment to nearby (within 300 kb) phosphorylation-regulated binding site(s). Such sites are defined as enriched in Myc-FOXC2 over Myc-pmFOXC2 (p-value<10<sup>-5</sup>) and overlapping with physiological FOXC2 binding sites enriched in endogenous FOXC2 over IgG control (FDR<0.001; Norrmén et al., 2009).

| Genes downregulated in response to the loss of FOXC2 phosphorylation in primary LECs |                 | Genes upregulated in response to the loss of FOXC2 phosphorylation in primary LECs |                  |
|--------------------------------------------------------------------------------------|-----------------|------------------------------------------------------------------------------------|------------------|
| <i>ACSL4</i>                                                                         | <i>ME2</i>      | <i>ABCA4</i>                                                                       | <i>ITGB3</i>     |
| <i>ACTR6</i>                                                                         | <i>MEGF9</i>    | <i>ABHD2</i>                                                                       | <i>KDELR3</i>    |
| <i>AGTPBP1</i>                                                                       | <i>MGAT4A</i>   | <i>ACACA</i>                                                                       | <i>KIAA0101</i>  |
| <i>ANKRD1</i>                                                                        | <i>MMP16</i>    | <i>ACAD10</i>                                                                      | <i>KIAA1279</i>  |
| <i>ANKRD5</i>                                                                        | <i>MORC4</i>    | <i>ACSS2</i>                                                                       | <i>LAMA4</i>     |
| <i>ANLN</i>                                                                          | <i>MPZL3</i>    | <i>AGPAT5</i>                                                                      | <i>LDHA</i>      |
| <i>APAF1</i>                                                                         | <i>MRC1</i>     | <i>ALDH1A1</i>                                                                     | <i>LGALS3BP</i>  |
| <i>APOL4</i>                                                                         | <i>MTBP</i>     | <i>ALDH7A1</i>                                                                     | <i>LOC286297</i> |
| <i>AREG</i>                                                                          | <i>MYCT1</i>    | <i>ALDOC</i>                                                                       | <i>LPCAT3</i>    |
| <i>ARHGDI3</i>                                                                       | <i>NCAPG</i>    | <i>AMIGO3</i>                                                                      | <i>MAP1B</i>     |
| <i>ARL13B</i>                                                                        | <i>NDVIP2</i>   | <i>ANAPC1</i>                                                                      | <i>MATN2</i>     |
| <i>ASPM</i>                                                                          | <i>NEO1</i>     | <i>AP1S3</i>                                                                       | <i>MBOAT4</i>    |
| <i>B3GNT2</i>                                                                        | <i>NET1</i>     | <i>AP4S1</i>                                                                       | <i>MBTD1</i>     |
| <i>B4GALT4</i>                                                                       | <i>NHEDC2</i>   | <i>AS3MT</i>                                                                       | <i>METTL7A</i>   |
| <i>BAIAP2L1</i>                                                                      | <i>NRG3</i>     | <i>ATP6V1A</i>                                                                     | <i>MLH3</i>      |
| <i>BAZ2B</i>                                                                         | <i>NSBP1</i>    | <i>BPHL</i>                                                                        | <i>MMP10</i>     |
| <i>BCL6</i>                                                                          | <i>NUF2</i>     | <i>BTN3A1</i>                                                                      | <i>MORN3</i>     |
| <i>BLZF1</i>                                                                         | <i>NUSAP1</i>   | <i>BTN3A2</i>                                                                      | <i>MPHOSPH9</i>  |
| <i>BMPR1A</i>                                                                        | <i>OBFC2A*</i>  | <i>C11orf83</i>                                                                    | <i>MTHFD2</i>    |
| <i>BNC1</i>                                                                          | <i>OVOS</i>     | <i>C12orf55</i>                                                                    | <i>MX1</i>       |
| <i>BRWD3</i>                                                                         | <i>OVOS2</i>    | <i>C16orf73</i>                                                                    | <i>MYLK4</i>     |
| <i>BTAF1</i>                                                                         | <i>PAIP2B</i>   | <i>C17orf57</i>                                                                    | <i>N4BP2L1</i>   |
| <i>BTBD3</i>                                                                         | <i>PCDH12</i>   | <i>C1R</i>                                                                         | <i>NAAA</i>      |
| <i>C10orf118*</i>                                                                    | <i>PDLIM5*</i>  | <i>C4orf49</i>                                                                     | <i>NEFH</i>      |
| <i>C11orf63</i>                                                                      | <i>PECAM1</i>   | <i>C5orf4</i>                                                                      | <i>NFKB2</i>     |
| <i>C12orf4</i>                                                                       | <i>PGM2L1*</i>  | <i>C6orf106</i>                                                                    | <i>NRIP2</i>     |
| <i>C18orf19</i>                                                                      | <i>PHF7</i>     | <i>C7orf23</i>                                                                     | <i>NUCB2</i>     |
| <i>C18orf54</i>                                                                      | <i>PHKA1</i>    | <i>CARD8</i>                                                                       | <i>OAS1</i>      |
| <i>C1GALT1</i>                                                                       | <i>PIK3CA</i>   | <i>CCBL2</i>                                                                       | <i>OAS3</i>      |
| <i>C21orf119</i>                                                                     | <i>PIK3R3</i>   | <i>CCNE2</i>                                                                       | <i>OAT</i>       |
| <i>C22orf28</i>                                                                      | <i>PIP5K3</i>   | <i>CCRL1</i>                                                                       | <i>OGN</i>       |
| <i>C2orf44</i>                                                                       | <i>PKHD1L1</i>  | <i>CD36</i>                                                                        | <i>P2RY5</i>     |
| <i>C3orf26*</i>                                                                      | <i>PLAG1</i>    | <i>CENPF</i>                                                                       | <i>PAPSS2</i>    |
| <i>C4orf18</i>                                                                       | <i>PLEK</i>     | <i>CEP110</i>                                                                      | <i>PBX3</i>      |
| <i>C6orf173</i>                                                                      | <i>PLEKHF2*</i> | <i>CGREF1</i>                                                                      | <i>PDE4B</i>     |
| <i>CA5B*</i>                                                                         | <i>PLS1</i>     | <i>CHAC1</i>                                                                       | <i>PFN2</i>      |
| <i>CABYR</i>                                                                         | <i>PLTP</i>     | <i>CHAC2</i>                                                                       | <i>PLA1A</i>     |
| <i>CCDC103</i>                                                                       | <i>POP1</i>     | <i>CHRNA6</i>                                                                      | <i>PLA2G10</i>   |

|                 |                        |                   |                |
|-----------------|------------------------|-------------------|----------------|
| CCDC134         | POSTN                  | <b>CLDN7</b>      | <b>PLAU</b>    |
| CCDC14          | PPM1A                  | <b>CLEC1A</b>     | PLAUR          |
| CCDC80          | PPP3CC                 | CLU               | <b>PLCE1</b>   |
| CCL2            | PRDM1                  | <b>CP</b>         | PLD6           |
| CCNA1           | PRKAA2                 | <b>CPB1</b>       | PPAT           |
| CCNA2           | PRPSAP2                | <b>CSGALNACT1</b> | PRICKLE1       |
| CCNB2           | PRUNE                  | CTDSPL            | <b>PSAT1</b>   |
| CDC2            | PTGS2                  | CXCL16            | PSEN2          |
| <b>CENPQ</b>    | PTPRK                  | CXorf23           | PSPH           |
| CHIC2           | PUS10                  | DCXR              | PSTPIP2        |
| CHMP2B          | <b>QPCT</b>            | DENND2C           | <b>PTPRB</b>   |
| <b>CLIC2</b>    | RALGPS2                | <b>DNAJC12</b>    | PTPRS          |
| COPS8           | RASSF2                 | DOCK9             | PYCR1          |
| COX16           | RASSF9                 | DPP4              | RACGAP1        |
| CPEB4*          | RB1CC1                 | EPH2              | RARB           |
| CREB5           | RBM19                  | EBP               | <b>RCN3</b>    |
| CRHR1           | RBM27                  | EIF2B3            | <b>RDH12</b>   |
| CSGALNACT2      | RCAN3                  | <b>ELA2A</b>      | RFTN2          |
| <b>CSNK1G3*</b> | REXO2                  | ENTPD5            | RNASEN         |
| CTAGE4          | <b>RFPL4A</b>          | <b>ERG</b>        | RNF144B        |
| <b>CTGF</b>     | RICTOR                 | <b>ESM1</b>       | RUFY3          |
| <b>CYB5R4</b>   | RIOK1                  | <b>EVI2B</b>      | <b>SAMD9</b>   |
| CYLD            | RLF                    | <b>FAM122B</b>    | <b>SAMHD1</b>  |
| CYP4X1          | RNGTT                  | <b>FAM177A1</b>   | <b>SCNN1B</b>  |
| DCP1A           | RNMT                   | <b>FAM49A</b>     | <b>SCNN1G</b>  |
| DDX52           | RPAP3                  | <b>FANCD2</b>     | SDPR           |
| DENND1B         | RPGR                   | <b>FECH</b>       | <b>SEPP1</b>   |
| <b>DGKA</b>     | <b>RPS6KA5</b>         | <b>FIGF</b>       | SERPINB1       |
| DHX8            | RRN3                   | FLJ11235          | SHANK3         |
| DICER1          | RRP12                  | FLVCR2            | SLC16A6        |
| DIRC2           | RSRC1                  | <b>FNDCC5</b>     | SLC1A1         |
| DLGAP5          | RTF1                   | FREQ              | SLC25A30       |
| DNAJC24         | <b>RTN3</b>            | <b>FRRS1</b>      | SLC25A4        |
| DONSON          | S100A16                | FZD4              | SLC31A1        |
| DUSP14          | SAV1                   | <b>GAB3</b>       | SLC44A3        |
| <b>DUSP18</b>   | SCN3B                  | <b>GCNT1</b>      | SNX22          |
| EBNA1BP2        | SDCCAG10               | GK                | SRXN1          |
| EDN1            | SEMA3D                 | GLDC              | SYNPO          |
| EFCAB5*         | SERPINI1               | GNG7              | <b>SYTL4</b>   |
| ELTD1           | SHOC2                  | GNPNAT1           | TBC1D4         |
| <b>EMP1</b>     | <b>SIPA1L2</b>         | GOLM1             | <b>TCTN2</b>   |
| EPB41L5*        | SLC19A2                | <b>GOLPH3L</b>    | TGFB3          |
| ERRFI1          | <b>SLC25A21</b>        | <b>GPD1L</b>      | <b>TLR3</b>    |
| <b>ETS2</b>     | SLC26A4                | <b>GPER</b>       | TM4SF1         |
| ETV4            | SLC35B3                | <b>GPR160</b>     | TMCO7          |
| EVI5            | <b>SLC39A12</b>        | GRHL1             | TMEM20         |
| EZH2            | SLC41A2                | HBEGF             | <b>TMEM56</b>  |
| FAM100B         | SLC5A6                 | hCG_2045899       | <b>TNFSF10</b> |
| FAM114A1        | <b>SLC7A8</b>          | <b>HCP5</b>       | TSPAN7         |
| FAM126B         | SLFN5                  | <b>HFE</b>        | <b>TWSG1</b>   |
| FAM172A         | SLU7                   | HPRT1             | USP18          |
| FAM98B          | SMC2                   | <b>HSPA2</b>      | USP39          |
| FANCI           | SNORD50B               | <b>IFI6</b>       | USP41          |
| <b>FANCL</b>    | <b>SNRPN//SNORD115</b> | <b>IFIT1</b>      | WEE1           |
| FBXL20          | -11                    | <b>IFIT2</b>      | <b>XPO4</b>    |
| FBXO42          | SNRPN//SNORD115        | IFIT3             | ZNF114         |
| FHL2*           | -26                    | <b>IGJ</b>        | ZNF608         |

|                                                                                                                                                                                                                                                                                                                                                                                                                                                                                                                                                                                                 |                                                                                                                                                                                                                                                                                                                                                                                                                                                                                                                                                                                                                |                 |  |
|-------------------------------------------------------------------------------------------------------------------------------------------------------------------------------------------------------------------------------------------------------------------------------------------------------------------------------------------------------------------------------------------------------------------------------------------------------------------------------------------------------------------------------------------------------------------------------------------------|----------------------------------------------------------------------------------------------------------------------------------------------------------------------------------------------------------------------------------------------------------------------------------------------------------------------------------------------------------------------------------------------------------------------------------------------------------------------------------------------------------------------------------------------------------------------------------------------------------------|-----------------|--|
| <p> FMR1<br/> FRMD5<br/> GARNL1<br/> GBP2<br/> GCA<br/> <b>GFRA1*</b><br/> <b>GIMAP5</b><br/> GLRB<br/> GLT8D3<br/> GMFG<br/> <b>GNG2</b><br/> GPN3<br/> HERC5<br/> HHIP<br/> HIST1H2BK<br/> HMCN1<br/> HMMR<br/> JHDM1D<br/> KATNA1<br/> KCTD9P2<br/> KIAA0256<br/> KIAA0895<br/> KIAA1107<br/> KIF11<br/> KIF20A<br/> <b>KLHL4</b><br/> <b>KLHL7</b><br/> <b>LCA5</b><br/> LIFR<br/> LMTK2<br/> LOC171220<br/> <b>LOC643837</b><br/> LOC727963<br/> LOC729927<br/> <b>LPHN2</b><br/> LRRRC28<br/> <b>LRRFIP1*</b><br/> LSG1<br/> MAK10<br/> MAP3K7IP3<br/> MAP9<br/> MAPKBP1<br/> MARCH8 </p> | <p> SNX7<br/> SP110<br/> <b>SPAG5</b><br/> SPOPL<br/> ST8SIA4<br/> STAT2<br/> STAT3<br/> <b>STON1-GTF2A1L</b><br/> STXBP3<br/> SULT1B1<br/> SYT11<br/> <b>TCP11L2</b><br/> <b>TDRKH</b><br/> TEX10<br/> TGFA<br/> THBS1<br/> <b>TLE4</b><br/> <b>TMEM154</b><br/> <b>TMLHE</b><br/> TNFRSF10D<br/> TOM1L1<br/> TPR<br/> <b>TSHZ2</b><br/> TTC18<br/> <b>TTLL4</b><br/> TUBA1A<br/> UBTD2<br/> UBXN7<br/> UHRF1BP1L<br/> USP53<br/> UTP6<br/> VAMP1<br/> WBP4<br/> WDR44<br/> WDR63*<br/> WDR91<br/> ZFPM2<br/> ZMPSTE24<br/> ZNF410<br/> ZNF490<br/> ZNF611<br/> ZNF654<br/> ZNF711<br/> ZRANB1<br/> ZW10 </p> | <p> IKBKAP </p> |  |
|-------------------------------------------------------------------------------------------------------------------------------------------------------------------------------------------------------------------------------------------------------------------------------------------------------------------------------------------------------------------------------------------------------------------------------------------------------------------------------------------------------------------------------------------------------------------------------------------------|----------------------------------------------------------------------------------------------------------------------------------------------------------------------------------------------------------------------------------------------------------------------------------------------------------------------------------------------------------------------------------------------------------------------------------------------------------------------------------------------------------------------------------------------------------------------------------------------------------------|-----------------|--|



## **Supplemental References**

**Norrmén, C, Ivanov, KI, Cheng, J, Zangger, N, Delorenzi, M, Jaquet, M, Miura, N, Puolakkainen, P, Horsley, V, Hu, J, Augustin, HG, Yla-Herttuala, S, Alitalo, K, Petrova, TV.** 2009. FOXC2 controls formation and maturation of lymphatic collecting vessels through cooperation with NFATc1. *J Cell Biol* **185**:439-57.

**Pitulescu, ME, Schmidt, I, Benedito, R, Adams, RH.** 2010. Inducible gene targeting in the neonatal vasculature and analysis of retinal angiogenesis in mice. *Nature protocols* **5**:1518-34.
